# Supplementary material for: Spin glass behavior and enhanced but frustrated magnetization in Ho3+ substituted Co–Zn ferrite interacting nanoparticles
Source: Royal Society of Chemistry journal article supplement (doi:10.1039/c6ra12541g), 2016-01-01
Supplement: c6ra12541g1.pdf [file c6ra12541g1.pdf]

**Supplementary Table 1. Discrepancy factors; Unweighted profile R factor ( $R_p$ ) weighted profile R-factor ( $R_{wp}$ ), expected R factor ( $R_{exp}$ ) and goodness fit factor ( $\chi^2$ )**

| Comp. x       | x=0.0 | x=0.025 | x=0.05 | x=0.075 | x=0.1 |
|---------------|-------|---------|--------|---------|-------|
| $R_p(\%)$     | 9.27  | 8.64    | 9.66   | 9.27    | 10.5  |
| $R_{wp}(\%)$  | 12.4  | 11.8    | 13.8   | 12.6    | 13.8  |
| $R_{exp}(\%)$ | 12.3  | 11.7    | 11.7   | 11.4    | 12    |
| $\chi^2$      | 1.02  | 1.02    | 1.39   | 1.22    | 1.32  |

**Supplementary Table 2. Values of atomic coordinates (x, y, z) determined from Rietveld refinement of XRD pattern of  $\text{CoZnHo}_x\text{Fe}_{2-x}\text{O}_4$**

| Ions | x=0.0  | x=0.025 | x=0.05 | x=0.075 | x=0.1  |
|------|--------|---------|--------|---------|--------|
|      | x=y=z  | x=y=z   | x=y=z  | x=y=z   | x=y=z  |
| Zn   | 0.1250 | 0.1250  | 0.1250 | 0.1250  | 0.1250 |
| Fe   | 0.1250 | 0.1250  | 0.1250 | 0.1250  | 0.1250 |
| Co   | 0.5000 | 0.5000  | 0.5000 | 0.5000  | 0.5000 |
| Fe   | 0.5000 | 0.5000  | 0.5000 | 0.5000  | 0.5000 |
| Ho   | 0.5000 | 0.5000  | 0.5000 | 0.5000  | 0.5000 |
| O    | 0.2546 | 0.2478  | 0.2498 | 0.2567  | 0.2645 |

**Supplementary Table 3. Percentage of the elements, calculated and as obtained from the EDS analysis of  $\text{CoZnHo}_x\text{Fe}_{2-x}\text{O}_4$**

| Comp.<br>x | Theoretical Percentage |      |      |       |       | Observed Percentage |      |      |       |       |
|------------|------------------------|------|------|-------|-------|---------------------|------|------|-------|-------|
|            | % Co                   | % Zn | % Ho | % Fe  | % O   | % Co                | % Zn | % Ho | % Fe  | % O   |
| 0          | 17.46                  | 8.12 | 0    | 47.35 | 27.07 | 17.33               | 8.29 | 0    | 46.71 | 27.67 |
| 0.025      | 17.26                  | 8.03 | 1.73 | 46.22 | 26.76 | 17.21               | 8.00 | 1.71 | 45.98 | 27.1  |
| 0.05       | 17.07                  | 7.94 | 3.41 | 45.12 | 26.46 | 17.03               | 7.92 | 3.32 | 45    | 26.73 |
| 0.075      | 16.88                  | 7.85 | 5.06 | 44.05 | 26.17 | 16.78               | 7.70 | 5.00 | 44.00 | 26.52 |
| 0.1        | 16.69                  | 7.76 | 6.67 | 43.00 | 25.88 | 16.58               | 7.68 | 6.58 | 43.06 | 26.1  |
